# Supplementary material
Source: publisher figshare collection journal article supplement (https://asha.figshare.com/articles/dataset/_/24036666)
Supplement: Supplementary file [file 1]

**Supplemental Material S2.** Accuracy comparison with McHaney et al., 2021.

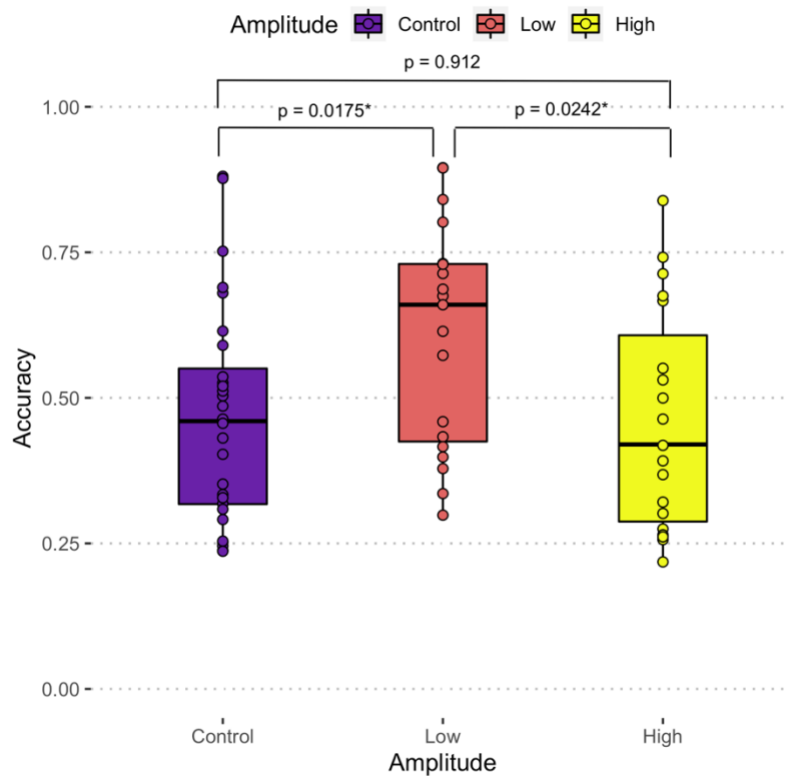

**Figure S2. Accuracy comparison with McHaney et al., 2021.** Boxplots indicate median and interquartile range for “Control” participants (purple; data adapted from McHaney et al., 2021), participants in the current study who received Low amplitude stimulation (red; min = 0.1, max = 0.6, mean = 0.34) or High amplitude stimulation (yellow; min = 0.7, max = 1.5, mean = 1.08). To facilitate comparison with McHaney et al., 2021, accuracy was only calculated over training blocks (generalization block excluded). A one-way ANOVA on stimulation amplitude revealed that groups differed by accuracy ( $F(2) = 3.83$ ,  $p = 0.027$ ). Post-hoc t-tests for between group contrasts indicated that participants in the Low amplitude group tended to respond more accurately during training compared to participants in the High amplitude group ( $p = 0.0242$ ) or participants in the Control group who did not receive stimulation ( $p = 0.0175$ ). The Control group and the High amplitude groups did not differ significantly with regards to accuracy ( $p = 0.912$ ).
